# Supplementary material
Source: publisher figshare collection journal article supplement (https://acs.figshare.com/ndownloader/files/4025071)
Supplement: Supplementary file 1 [file 4025071]

data_cell
_chemical_name_mineral 
_cell_length_a  10.522679(22)
_cell_length_b  10.522679(22)
_cell_length_c  10.522679(22)
_cell_angle_alpha 90
_cell_angle_beta  90
_cell_angle_gamma 90
_cell_volume 1165.1424(73)
_symmetry_space_group_name_H-M Fd-3m:2
loop_
_symmetry_equiv_pos_as_xyz
	'-x, -y, -z'
	'-x, -y+1/2, -z+1/2'
	'-x, -z, -y'
	'-x, -z+1/2, -y+1/2'
	'-x, z+1/4, y+1/4'
	'-x, z-1/4, y-1/4'
	'-x, y+1/4, z+1/4'
	'-x, y-1/4, z-1/4'
	'-x+1/4, -y+1/4, z'
	'-x+1/4, -y-1/4, z+1/2'
	'-x+1/4, -z+1/4, y'
	'-x+1/4, -z-1/4, y+1/2'
	'-x+1/4, z, -y+1/4'
	'-x+1/4, z+1/2, -y-1/4'
	'-x+1/4, y, -z+1/4'
	'-x+1/4, y+1/2, -z-1/4'
	'-x+1/2, -y, -z+1/2'
	'-x+1/2, -y+1/2, -z'
	'-x+1/2, -z, -y+1/2'
	'-x+1/2, -z+1/2, -y'
	'-x+1/2, z+1/4, y-1/4'
	'-x+1/2, z-1/4, y+1/4'
	'-x+1/2, y+1/4, z-1/4'
	'-x+1/2, y-1/4, z+1/4'
	'-x-1/4, -y+1/4, z+1/2'
	'-x-1/4, -y-1/4, z'
	'-x-1/4, -z+1/4, y+1/2'
	'-x-1/4, -z-1/4, y'
	'-x-1/4, z, -y-1/4'
	'-x-1/4, z+1/2, -y+1/4'
	'-x-1/4, y, -z-1/4'
	'-x-1/4, y+1/2, -z+1/4'
	'-y, -x, -z'
	'-y, -x+1/2, -z+1/2'
	'-y, -z, -x'
	'-y, -z+1/2, -x+1/2'
	'-y, z+1/4, x+1/4'
	'-y, z-1/4, x-1/4'
	'-y, x+1/4, z+1/4'
	'-y, x-1/4, z-1/4'
	'-y+1/4, -x+1/4, z'
	'-y+1/4, -x-1/4, z+1/2'
	'-y+1/4, -z+1/4, x'
	'-y+1/4, -z-1/4, x+1/2'
	'-y+1/4, z, -x+1/4'
	'-y+1/4, z+1/2, -x-1/4'
	'-y+1/4, x, -z+1/4'
	'-y+1/4, x+1/2, -z-1/4'
	'-y+1/2, -x, -z+1/2'
	'-y+1/2, -x+1/2, -z'
	'-y+1/2, -z, -x+1/2'
	'-y+1/2, -z+1/2, -x'
	'-y+1/2, z+1/4, x-1/4'
	'-y+1/2, z-1/4, x+1/4'
	'-y+1/2, x+1/4, z-1/4'
	'-y+1/2, x-1/4, z+1/4'
	'-y-1/4, -x+1/4, z+1/2'
	'-y-1/4, -x-1/4, z'
	'-y-1/4, -z+1/4, x+1/2'
	'-y-1/4, -z-1/4, x'
	'-y-1/4, z, -x-1/4'
	'-y-1/4, z+1/2, -x+1/4'
	'-y-1/4, x, -z-1/4'
	'-y-1/4, x+1/2, -z+1/4'
	'-z, -x, -y'
	'-z, -x+1/2, -y+1/2'
	'-z, -y, -x'
	'-z, -y+1/2, -x+1/2'
	'-z, y+1/4, x+1/4'
	'-z, y-1/4, x-1/4'
	'-z, x+1/4, y+1/4'
	'-z, x-1/4, y-1/4'
	'-z+1/4, -x+1/4, y'
	'-z+1/4, -x-1/4, y+1/2'
	'-z+1/4, -y+1/4, x'
	'-z+1/4, -y-1/4, x+1/2'
	'-z+1/4, y, -x+1/4'
	'-z+1/4, y+1/2, -x-1/4'
	'-z+1/4, x, -y+1/4'
	'-z+1/4, x+1/2, -y-1/4'
	'-z+1/2, -x, -y+1/2'
	'-z+1/2, -x+1/2, -y'
	'-z+1/2, -y, -x+1/2'
	'-z+1/2, -y+1/2, -x'
	'-z+1/2, y+1/4, x-1/4'
	'-z+1/2, y-1/4, x+1/4'
	'-z+1/2, x+1/4, y-1/4'
	'-z+1/2, x-1/4, y+1/4'
	'-z-1/4, -x+1/4, y+1/2'
	'-z-1/4, -x-1/4, y'
	'-z-1/4, -y+1/4, x+1/2'
	'-z-1/4, -y-1/4, x'
	'-z-1/4, y, -x-1/4'
	'-z-1/4, y+1/2, -x+1/4'
	'-z-1/4, x, -y-1/4'
	'-z-1/4, x+1/2, -y+1/4'
	'z, -x+1/4, -y+1/4'
	'z, -x-1/4, -y-1/4'
	'z, -y+1/4, -x+1/4'
	'z, -y-1/4, -x-1/4'
	'z, y, x'
	'z, y+1/2, x+1/2'
	'z, x, y'
	'z, x+1/2, y+1/2'
	'z+1/4, -x, y+1/4'
	'z+1/4, -x+1/2, y-1/4'
	'z+1/4, -y, x+1/4'
	'z+1/4, -y+1/2, x-1/4'
	'z+1/4, y+1/4, -x'
	'z+1/4, y-1/4, -x+1/2'
	'z+1/4, x+1/4, -y'
	'z+1/4, x-1/4, -y+1/2'
	'z+1/2, -x+1/4, -y-1/4'
	'z+1/2, -x-1/4, -y+1/4'
	'z+1/2, -y+1/4, -x-1/4'
	'z+1/2, -y-1/4, -x+1/4'
	'z+1/2, y, x+1/2'
	'z+1/2, y+1/2, x'
	'z+1/2, x, y+1/2'
	'z+1/2, x+1/2, y'
	'z-1/4, -x, y-1/4'
	'z-1/4, -x+1/2, y+1/4'
	'z-1/4, -y, x-1/4'
	'z-1/4, -y+1/2, x+1/4'
	'z-1/4, y+1/4, -x+1/2'
	'z-1/4, y-1/4, -x'
	'z-1/4, x+1/4, -y+1/2'
	'z-1/4, x-1/4, -y'
	'y, -x+1/4, -z+1/4'
	'y, -x-1/4, -z-1/4'
	'y, -z+1/4, -x+1/4'
	'y, -z-1/4, -x-1/4'
	'y, z, x'
	'y, z+1/2, x+1/2'
	'y, x, z'
	'y, x+1/2, z+1/2'
	'y+1/4, -x, z+1/4'
	'y+1/4, -x+1/2, z-1/4'
	'y+1/4, -z, x+1/4'
	'y+1/4, -z+1/2, x-1/4'
	'y+1/4, z+1/4, -x'
	'y+1/4, z-1/4, -x+1/2'
	'y+1/4, x+1/4, -z'
	'y+1/4, x-1/4, -z+1/2'
	'y+1/2, -x+1/4, -z-1/4'
	'y+1/2, -x-1/4, -z+1/4'
	'y+1/2, -z+1/4, -x-1/4'
	'y+1/2, -z-1/4, -x+1/4'
	'y+1/2, z, x+1/2'
	'y+1/2, z+1/2, x'
	'y+1/2, x, z+1/2'
	'y+1/2, x+1/2, z'
	'y-1/4, -x, z-1/4'
	'y-1/4, -x+1/2, z+1/4'
	'y-1/4, -z, x-1/4'
	'y-1/4, -z+1/2, x+1/4'
	'y-1/4, z+1/4, -x+1/2'
	'y-1/4, z-1/4, -x'
	'y-1/4, x+1/4, -z+1/2'
	'y-1/4, x-1/4, -z'
	'x, -y+1/4, -z+1/4'
	'x, -y-1/4, -z-1/4'
	'x, -z+1/4, -y+1/4'
	'x, -z-1/4, -y-1/4'
	'x, z, y'
	'x, z+1/2, y+1/2'
	'x, y, z'
	'x, y+1/2, z+1/2'
	'x+1/4, -y, z+1/4'
	'x+1/4, -y+1/2, z-1/4'
	'x+1/4, -z, y+1/4'
	'x+1/4, -z+1/2, y-1/4'
	'x+1/4, z+1/4, -y'
	'x+1/4, z-1/4, -y+1/2'
	'x+1/4, y+1/4, -z'
	'x+1/4, y-1/4, -z+1/2'
	'x+1/2, -y+1/4, -z-1/4'
	'x+1/2, -y-1/4, -z+1/4'
	'x+1/2, -z+1/4, -y-1/4'
	'x+1/2, -z-1/4, -y+1/4'
	'x+1/2, z, y+1/2'
	'x+1/2, z+1/2, y'
	'x+1/2, y, z+1/2'
	'x+1/2, y+1/2, z'
	'x-1/4, -y, z-1/4'
	'x-1/4, -y+1/2, z+1/4'
	'x-1/4, -z, y-1/4'
	'x-1/4, -z+1/2, y+1/4'
	'x-1/4, z+1/4, -y+1/2'
	'x-1/4, z-1/4, -y'
	'x-1/4, y+1/4, -z+1/2'
	'x-1/4, y-1/4, -z'
loop_
_atom_site_label
_atom_site_type_symbol
_atom_site_fract_x
_atom_site_fract_y
_atom_site_fract_z
_atom_site_occupancy
_atom_site_symmetry_multiplicity
_atom_site_adp_type
_atom_site_U_iso_or_equiv
Ag Ag 0 0 0 0.4   0 Biso 0
Bi Bi 0 0.01864(48) -0.01864(48) 0.06944444   0 Biso 1.174(68)
Ta Ta 0.5 0.5 0.5 1   0 Biso 0.6001(80)
O1 O 0.43654(4) 0.125 0.125 1   0 Biso 0
O2 O 0.13716(23) 0.13716(23) 0.13716(23) 0.125   0 Biso 1.442(89)
loop_
_atom_site_aniso_label
_atom_site_aniso_U_11
_atom_site_aniso_U_22
_atom_site_aniso_U_33
_atom_site_aniso_U_12
_atom_site_aniso_U_13
_atom_site_aniso_U_23
Ag 0.0297(14) 0.0297(14) 0.0297(14) 0.0093(11) 0.0093(11) 0.0093(11)
O1 0.01231(19) 0.01462(14) 0.01462(14) 0 0 -0.014(3)
